# Supplementary material
Source: Research Square preprint supplement (doi:10.21203/rs.3.rs-9341929/v1)
Supplement: Supplementary file 1 [file 2e4bccfde0fc2f4a6a793f67.docx]

Supplementary Information for

**Bright and stable Cr3+-activated protoenstatite near-infrared emitter**

Lei Zhonga, Yuefei Xianga, Zhe Wua, Junfu Tanga, Shidan Raoa, Chunyan Jianga,b*, Lei Zhoua,c*, Xiaojun Wangd, Mingmei Wua

a Zhuhai Key Laboratory of Optoelectronic Functional Materials and Membrane Technology, School of Chemical Engineering and Technology, Sun Yat-sen University, Zhuhai 519082, China

b Centre for Optical and Electromagnetic Research, Guangdong Engineering Research Centre of Optoelectronic Intelligent Information Perception, South China Academy of Advanced Optoelectronics, South China Normal University, Guangzhou 510006, China

c Southern Marine Science and Engineering Guangdong Laboratory (Zhuhai), Sun Yat-sen University, Zhuhai 519082, China

d Department of Physics, Georgia Southern University, Statesboro, GA 30460, USA

* Corresponding authors: [jiangchy0119@m.scnu.edu.cn](mailto:jiangchy0119@m.scnu.edu.cn) (C. Jiang); [zhoul8@mail.sysu.edu.cn](mailto:leizhou8@mail.sysu.edu.cn) (L. Zhou)

**Supplementary Fig. 1** **a** XRD patterns under different doping conditions. **b** XRD patterns of single-doped sample before and after aging. **c** XRD patterns of Cr3+, Li+ co-doped sample before and after aging.

**Supplementary Fig. 2** XRD Rietveld refinement plot of MgSiO3:*x*%Cr,Li.

**Supplementary Fig. 3** XPS spectrum of MgSiO3:Cr,Li.


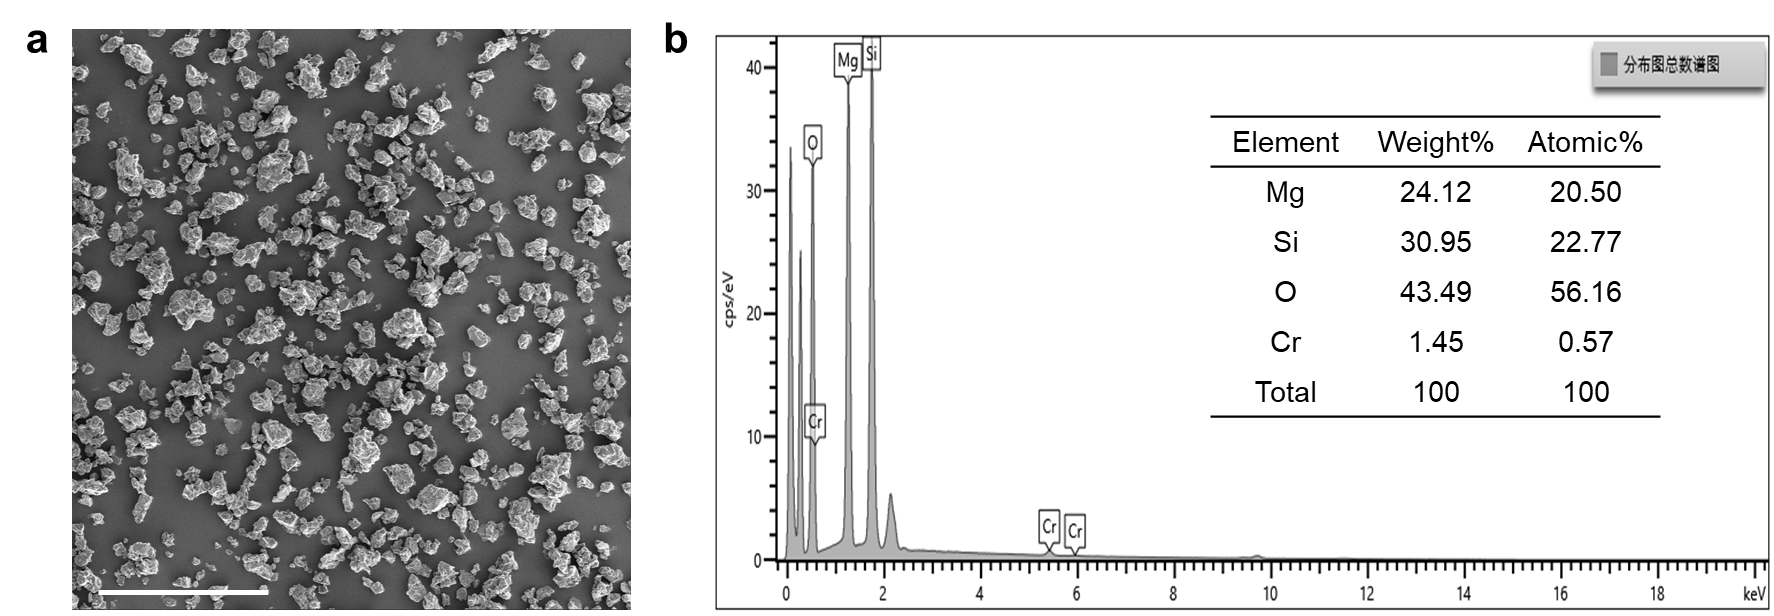


**Supplementary Fig. 4** **a** SEM image and **b** energy dispersive spectrum of MgSiO3:Cr,Li.

**Supplementary Fig. 5** Diffuse reflection spectra MgSiO3:*x*%Cr,Li.

**Supplementary Fig. 6** Determination of the optical band gap.

**Supplementary Fig. 7** **a-f** Deconvolution plots of the PL spectra of MgSiO3:*x*%Cr,Li upon 450 cm excitation.

**Supplementary Fig. 8** **a** Decay curves of MgSiO3:*x*%Cr,Li monitoring the emission of Cr1 at room temperature. **b** Average decay time of MgSiO3:*x*%Cr,Li.

**Supplementary Fig. 9** Decay curve of MgSiO3:0.25%Cr,Li and MgSiO3:2%Cr,Li at 83 K.

**Supplementary Fig. 10** IQE, AE, and EQE for MgSiO3:*x*%Cr,Li.

**Supplementary Fig. 11** Dq/B and Mg1–O bond length with difference Cr3+ doping concentration.

**Supplementary Fig. 12** **a-h** XRD Rietveld refinement of MgSiO3: Cr,*y*%Li.

**Supplementary Fig. 13** The Calculated formation energies for the four models. Model 1: Cr→Mg2 + Li→Mg2; model 2: Cr→Mg2 + Li→Mg1; model 3: Cr→Mg1 + Li→Mg2; model 4: Cr→Mg1 + Li→Mg1.

**Supplementary Fig. 14** Bond length of Mg–O of MgSiO3:Cr,*y*%Li versus Li+ content.

**Supplementary Fig. 15** EPR spectra of MgSiO3:*x*%Cr,*y*%Li measured at room temperature.

**Supplementary Fig. 16** XRD patterns after 7 days of immersion in different liquids.

**Supplementary Fig. 17** Thermal images of NIR pc-LED device at different driving currents.

**Supplementary Fig. 18** **a** Driven current-dependent emission spectra of the fabricated NIR pc-LED. The inset shows a photograph of the fabricated pc-LED device on a fingertip. **b** Electro-optical conversion efficiency and blue-to-NIR light conversion efficiency versus driving currents. **c** Output powers versus driving currents.

**Supplementary Table 1** Rietveld refinement structural data of MgSiO3:*x*%Cr,Li.

|  | *x* = 0.25 | *x =* 0.5 | *x =* 1 | *x =* 1.5 | *x =* 2 | *x* = 2.5 |
| --- | --- | --- | --- | --- | --- | --- |
| *a* (Å) | 9.2563 | 9.2545 | 9.2521 | 9.2494 | 9.2468 | 9.2449 |
| *b* (Å) | 8.7474 | 8.7461 | 8.7440 | 8.7418 | 8.7390 | 8.7366 |
| *c* (Å) | 5.3213 | 5.3209 | 5.3203 | 5.3193 | 5.3186 | 5.3182 |
| *V* (Å3) | 430.8574 | 430.6828 | 430.4105 | 430.1032 | 429.7854 | 429.5440 |
| *R*wp (%) | 12.5 | 10.9 | 10.3 | 10.1 | 9.63 | 9.39 |
| *R*p (%) | 8.09 | 7.29 | 6.96 | 7.01 | 6.48 | 6.23 |
| χ2 | 2.57 | 1.89 | 1.72 | 1.62 | 1.54 | 1.51 |

**Supplementary Table 2** The atom positions, fraction factors, and thermal vibration parameters of MgSiO3:Cr,*y*%Li.

| Atom (*y* = 4) | Wyck. | x | y | z | Occ. | B (iso.) |
| --- | --- | --- | --- | --- | --- | --- |
| Mg1 | 4c | 0.00000 | 0.26441 | 0.25000 | 1 | 7.271 |
| Mg2 | 4c | 0.00000 | 0.09690 | 0.75000 | 1 | 5.906 |
| Si1 | 8d | 0.29488 | 0.09156 | 0.07063 | 1 | 7.187 |
| O1 | 8d | 0.11775 | 0.09248 | 0.07618 | 1 | 5.541 |
| O2 | 8d | 0.37637 | 0.25540 | 0.07530 | 1 | 6.396 |
| O3 | 8d | 0.35173 | -0.02430 | 0.29530 | 1 | 6.228 |

| Atom (*y* = 4.5) | Wyck. | x | y | z | Occ. | B (iso.) |
| --- | --- | --- | --- | --- | --- | --- |
| Mg1 | 4c | 0.00000 | 0.26317 | 0.25000 | 1 | 6.542 |
| Mg2 | 4c | 0.00000 | 0.09699 | 0.75000 | 1 | 4.877 |
| Si1 | 8d | 0.29577 | 0.09165 | 0.06992 | 1 | 5.970 |
| O1 | 8d | 0.12105 | 0.09207 | 0.07587 | 1 | 4.705 |
| O2 | 8d | 0.37829 | 0.25353 | 0.07301 | 1 | 5.259 |
| O3 | 8d | 0.35195 | -0.02450 | 0.29468 | 1 | 4.868 |

| Atom (*y* = 5) | Wyck. | x | y | z | Occ. | B (iso.) |
| --- | --- | --- | --- | --- | --- | --- |
| Mg1 | 4c | 0.00000 | 0.26067 | 0.25000 | 1 | 6.693 |
| Mg2 | 4c | 0.00000 | 0.09663 | 0.75000 | 1 | 5.406 |
| Si1 | 8d | 0.29420 | 0.09234 | 0.07309 | 1 | 6.276 |
| O1 | 8d | 0.11887 | 0.09209 | 0.08333 | 1 | 5.037 |
| O2 | 8d | 0.37725 | 0.25230 | 0.07186 | 1 | 5.638 |
| O3 | 8d | 0.35265 | -0.02050 | 0.29694 | 1 | 5.536 |

| Atom (*y* = 5.5) | Wyck. | x | y | z | Occ. | B (iso.) |
| --- | --- | --- | --- | --- | --- | --- |
| Mg1 | 4c | 0.00000 | 0.26024 | 0.25000 | 1 | 6.932 |
| Mg2 | 4c | 0.00000 | 0.09637 | 0.75000 | 1 | 5.741 |
| Si1 | 8d | 0.29347 | 0.09233 | 0.07351 | 1 | 6.632 |
| O1 | 8d | 0.11828 | 0.09200 | 0.08404 | 1 | 5.403 |
| O2 | 8d | 0.37710 | 0.25180 | 0.07172 | 1 | 5.935 |
| O3 | 8d | 0.35218 | -0.01980 | 0.29861 | 1 | 6.119 |

| Atom (*y* = 6) | Wyck. | x | y | z | Occ. | B (iso.) |
| --- | --- | --- | --- | --- | --- | --- |
| Mg1 | 4c | 0.00000 | 0.25980 | 0.25000 | 1 | 6.685 |
| Mg2 | 4c | 0.00000 | 0.09680 | 0.75000 | 1 | 5.424 |
| Si1 | 8d | 0.29350 | 0.09220 | 0.07260 | 1 | 6.172 |
| O1 | 8d | 0.11830 | 0.09230 | 0.08400 | 1 | 5.316 |
| O2 | 8d | 0.37640 | 0.25070 | 0.07080 | 1 | 5.606 |
| O3 | 8d | 0.35270 | -0.01900 | 0.29670 | 1 | 5.711 |

| Atom (*y* = 6.5) | Wyck. | x | y | z | Occ. | B (iso.) |
| --- | --- | --- | --- | --- | --- | --- |
| Mg1 | 4c | 0.00000 | 0.25913 | 0.25000 | 1 | 6.564 |
| Mg2 | 4c | 0.00000 | 0.09659 | 0.75000 | 1 | 5.352 |
| Si1 | 8d | 0.29378 | 0.09223 | 0.07291 | 1 | 6.183 |
| O1 | 8d | 0.11867 | 0.09248 | 0.08266 | 1 | 5.199 |
| O2 | 8d | 0.37662 | 0.25230 | 0.07186 | 1 | 5.486 |
| O3 | 8d | 0.35354 | -0.01820 | 0.29619 | 1 | 5.931 |

| Atom (*y* = 7) | Wyck. | x | y | z | Occ. | B (iso.) |
| --- | --- | --- | --- | --- | --- | --- |
| Mg1 | 4c | 0.00000 | 0.25902 | 0.25000 | 1 | 6.273 |
| Mg2 | 4c | 0.00000 | 0.09625 | 0.75000 | 1 | 4.990 |
| Si1 | 8d | 0.29419 | 0.09266 | 0.07299 | 1 | 5.955 |
| O1 | 8d | 0.11889 | 0.09228 | 0.08402 | 1 | 4.973 |
| O2 | 8d | 0.37660 | 0.25160 | 0.06882 | 1 | 5.163 |
| O3 | 8d | 0.35295 | -0.01740 | 0.29698 | 1 | 5.632 |

| Atom (*y* = 7.5) | Wyck. | x | y | z | Occ. | B (iso.) |
| --- | --- | --- | --- | --- | --- | --- |
| Mg1 | 4c | 0.00000 | 0.25863 | 0.25000 | 1 | 6.570 |
| Mg2 | 4c | 0.00000 | 0.09594 | 0.75000 | 1 | 5.305 |
| Si1 | 8d | 0.29383 | 0.09239 | 0.07333 | 1 | 6.296 |
| O1 | 8d | 0.11869 | 0.09260 | 0.08473 | 1 | 5.348 |
| O2 | 8d | 0.37696 | 0.25085 | 0.06937 | 1 | 5.317 |
| O3 | 8d | 0.35264 | -0.01730 | 0.29718 | 1 | 6.029 |

**Supplementary Table 3** Mg1-O bond length in MgSiO3:Cr,*y*%Li.

|  | *y* = 4 | *y =* 4.5 | *y = 5* | *y =* 5.5 | *y =* 6 | *y* = 6.5 | *y* = 7 | *y* = 7.5 |
| --- | --- | --- | --- | --- | --- | --- | --- | --- |
| Mg1-O3Ⅰ | 2.3087 | 2.3195 | 2.3620 | 2.3728 | 2.3786 | 2.3840 | 2.3939 | 2.3985 |
| Mg1-O2Ⅱ | 2.0780 | 2.0602 | 2.0576 | 2.0569 | 2.0559 | 2.0504 | 2.0466 | 2.0462 |
| Mg1-O1Ⅲ | 2.0759 | 2.0860 | 2.0413 | 2.0337 | 2.0302 | 2.0296 | 2.0280 | 2.0204 |
| Mg1-O3Ⅳ | 2.3087 | 2.3195 | 2.3620 | 2.3728 | 2.3786 | 2.3840 | 2.3939 | 2.3985 |
| Mg1-O1Ⅴ | 2.0759 | 2.0860 | 2.0413 | 2.0337 | 2.0302 | 2.0296 | 2.0280 | 2.0204 |
| Mg1-O2Ⅵ | 2.0780 | 2.0602 | 2.0576 | 2.0569 | 2.0559 | 2.0504 | 2.0466 | 2.0462 |
| *D* of [Mg1-O] | 4.782% | 5.081% | 6.452% | 6.756% | 6.920% | 7.096% | 7.350% | 7.532% |

**Supplementary Table 4** Several excellent Cr3+-doped NIR phosphors.

| Number | Material | λex (nm) | λem (nm) | IQE (%) | EQE (%) | Reference |
| --- | --- | --- | --- | --- | --- | --- |
| 1 | Y2CaAl4SiO12:Cr3+ | 440 | 744 | 75.9 | 28.1 | 1 |
| 2 | Ca2LuZr2Al3O12:Cr3+ | 460 | 750 | 69.1 | 31.5 | 2 |
| 3 | SrGa12O19:Cr3+ | 415 | 765 | 98.2 | 45 | 3 |
| 4 | Na3ScF6:Cr3+ | 436 | 774 | 91.5 | 40.8 | 4 |
| 5 | AlP3O9:Cr3+ | 450 | 780 | 75 | 36 | 5 |
| 6 | KAlP2O7:Cr3+ | 450 | 790 | 78.8 | 31.1 | 6 |
| 7 | Ga1.6In0.4O3:Cr3+ | 450 | 800 | 88 | 44 | 7 |
| 8 | LuCa2ScZrGa2GeO12:Cr3+ | 456 | 815 | 68.75 | 26.11 | 8 |
| 9 | GaTaO4:Cr3+ | 460 | 840 | 91.2 | 31.3 | 9 |
| 10 | Mg4Ta2O9:Cr3+ | 450 | 842 | 87.5 | 61.25 | 10 |
| 11 | Mg1.2Ga1.8O3.8F0.2:Cr3+ | 420 | 870 | 93.2 | 60.6 | 11 |
| 12 | LiInGe2O6:Cr3+ | 460 | 880 | 81.2 | 39.8 | 12 |
| 13 | LiScGe2O6:Cr3+ | 480 | 886 | 72.6 | 39.9 | 13 |
| 14 | LiInO2:Cr3+ | 468 | 897 | 42.4 | 24.5 | 14 |
| 15 | Ga2GeO5 | 428 | ~910 | 71.25 | 18.95 | 15 |
| 16 | Mg0.8Zn0.2Ga2O4:Cr3+ | 420 | 913 | 83.9 | 35.7 | 16 |
| 17 | Mg2GeO4:Cr3+ | 465 | 940 | 48 | 16.38 | 17 |
| 18 | CaSc0.8Al1.15SiO6:Cr3+ | 460 | 950 | 30 | 9.3 | 18 |
| 19 | Mg2SiO4:Cr3+,Li+ | 468 | 960 | 70 | 48 | 19 |
| 20 | LiIn2SbO6:Cr3+ | 492 | 970 | 7 | 3.44 | 20 |
| 21 | MgSiO3:Cr3+,Li+ | 450 | 880 | 96 | 64 | This work |

**Supplementary Table 5** Detailed performances of the fabricated NIR pc-LED (COB).

| Drive Current (mA) | Voltage (V) | Blue output power (mW) | NIR output power (mW) | NIR electro-optical conversion efficiency (%) |
| --- | --- | --- | --- | --- |
| 20 | 7.706 | 2.756 | 42.999 | 27.958 |
| 50 | 7.816 | 7.028 | 106.316 | 27.212 |
| 100 | 7.929 | 14.102 | 213.073 | 26.886 |
| 200 | 8.092 | 28.064 | 419.230 | 25.91 |
| 300 | 8.227 | 41.911 | 621.552 | 25.184 |
| 400 | 8.351 | 55.516 | 818.578 | 24.508 |
| 500 | 8.466 | 68.915 | 1008.032 | 23.814 |
| 600 | 8.577 | 82.012 | 1193.500 | 23.197 |
| 700 | 8.682 | 94.964 | 1371.805 | 22.574 |
| 800 | 8.785 | 107.619 | 1548.144 | 22.031 |
| 900 | 8.885 | 120.555 | 1723.849 | 21.559 |
| 1000 | 8.983 | 132.390 | 1883.017 | 20.964 |
| 1100 | 9.078 | 144.675 | 2053.324 | 20.562 |
| 1200 | 9.172 | 155.706 | 2204.716 | 20.032 |
| 1300 | 9.264 | 167.161 | 2360.296 | 19.599 |
| 1400 | 9.355 | 178.100 | 2505.874 | 19.133 |
| 1500 | 9.445 | 188.897 | 2645.951 | 18.677 |
| 1600 | 9.535 | 198.946 | 2768.753 | 18.149 |

**Supplementary Table 6** Detailed performances of the fabricated NIR pc-LED (SMD).

| Drive Current (mA) | Voltage (V) | Blue output power (mW) | NIR output power (mW) | NIR electro-optical conversion efficiency (%) |
| --- | --- | --- | --- | --- |
| 10 | 2.609 | 1.032 | 8.595 | 32.905 |
| 20 | 2.656 | 2.034 | 16.76 | 31.533 |
| 40 | 2.724 | 4.013 | 32.667 | 29.997 |
| 60 | 2.779 | 5.926 | 48.089 | 28.83 |
| 80 | 2.829 | 7.773 | 62.25 | 27.508 |
| 100 | 2.877 | 9.564 | 75.828 | 26.357 |
| 120 | 2.922 | 11.276 | 88.652 | 25.286 |
| 140 | 2.964 | 12.97 | 100.296 | 24.162 |
| 160 | 3.005 | 14.591 | 111.578 | 23.202 |
| 180 | 3.045 | 16.132 | 121.535 | 22.166 |
| 200 | 3.084 | 17.579 | 130.673 | 21.189 |
| 220 | 3.122 | 18.952 | 139.249 | 20.272 |
| 240 | 3.160 | 20.213 | 146.241 | 19.285 |
| 260 | 3.197 | 21.39 | 152.394 | 18.330 |
| 280 | 3.234 | 22.464 | 157.587 | 17.403 |
| 300 | 3.271 | 23.423 | 161.666 | 16.473 |

(1)

(2)

(3)

(4)

**Supplementary Equation 1–4.** The calculation formula of *D*q/B,where *D*q is the crystal field splitting energy, the Racah parameter *B* indicates the repulsion between 3*d* orbital electrons, and Δ*E* represents the energy difference between the 4T1 and 4T2 states as determined from the PL and PLE spectra. Δ*S* is the Stokes shift obtained from the energy difference between *E*(4A2 → 4T2) in the PLE spectrum and *E*(4T2 → 4A2) in the PL spectrum.

(5)

**Supplementary Equation 5.** The calculation formula of distortion index (*D*dis), where *n* is the coordination number. *di* is the distance from Mg to the *i*-th coordinating O atoms, and *dav* is the average Mg–O distance.

(6)

(7)

**Supplementary Equation 6–7.** The fitting formulas of decay curves, where *I*(*t*) represents the luminescence intensity at time *t*, *A*1, *A*2, and *I*0 are the fitting constants, and *τ*1 and *τ*2 represent the lifetime for exponential components.

(8)

**Supplementary Equation 8.** The calculation formula of activation energy, where 𝐼0 and 𝐼𝑇 represent emission intensity at temperature 123 K and *T*, respectively; *C* is the constant of host; *k* represents the Boltzmann's constant.

(9)

**Supplementary Equation 9**. The calculation formula of Huang-Rhys factor (*S*), where *FWHM*(*T*) is acquired from emission spectra at each temperature *T*, ℎ𝑣𝑣 is the photon energy and *k* is the Boltzmann's constant.

**References**

1. Mao M., et al. Broadband near-infrared (NIR) emission realized by the crystal-field engineering of Y3−xCaxAl5−xSixO12:Cr3+ (x = 0–2.0) garnet phosphors. *J. Mater. Chem. C* **8**, 1981-1988 (2020).

2. Zhang L., et al. A high efficiency broad-band near-infrared Ca2LuZr2Al3O12:Cr3+ garnet phosphor for blue LED chips. *J. Mater. Chem. C* **6**, 4967-4976 (2018).

3. Liu S., et al. Site engineering strategy toward enhanced luminescence thermostability of a Cr3+-doped broadband NIR phosphor and its application. *Mater. Chem. Front.* **5**, 3841-3849 (2021).

4. He F., et al. A general ammonium salt assisted synthesis strategy for Cr3+-doped hexafluorides with highly efficient near infrared emissions. *Adv. Funct. Mater.* **31**, 2103743 (2021).

5. Huang D., et al. Efficient and thermally stable broadband near-infrared emission from near zero thermal expansion AlP3O9:Cr3+ phosphors. *Inorg. Chem. Front.* **9**, 1692-1700 (2022).

6. Zhang H., et al. Efficient and thermally stable broad-band near-infrared emission in a KAlP2O7:Cr3+ phosphor for nondestructive examination. *ACS Appl. Mater. Interfaces* **14**, 11663-11671 (2022).

7. Zhong J., et al. Efficient and tunable luminescence in Ga2–xInxO3:Cr3+ for near-infrared imaging. *ACS Appl. Mater. Interfaces* **13**, 31835-31842 (2021).

8. Xie J., et al. Near-infrared LuCa2ScZrGa2GeO12:Cr3+ garnet phosphor with ultra-broadband emission for NIR LED applications. *Inorg. Chem.* **62**, 10772-10779 (2023).

9. Zhong J., et al. Efficient broadband near-infrared emission in the GaTaO4:Cr3+ phosphor. *Adv. Opt. Mater.* **10**, 2101800 (2022).

10. Wang S., et al. Achieving high quantum efficiency broadband NIR Mg4Ta2O9:Cr3+ phosphor through lithium-ion compensation. *Adv. Mater.* **35**, e2300124 (2023).

11. Yao L., et al. Simultaneous absorption and near-infrared emission enhancement of Cr3+ ions in MgGa2O4 spinel oxide via anionic F-substitution. *Adv. Opt. Mater.* **11**, 2202458 (2023).

12. Liu T., et al. Efficient near-infrared pyroxene phosphor LiInGe2O6:Cr3+ for NIR spectroscopy application. *J. Am. Ceram. Soc.* **104**, 4577-4584 (2021).

13. Chen X. H., et al. Distorted octahedral site occupation-induced high-efficiency broadband near-infrared emission in LiScGe2O6:Cr3+ phosphor. *J. Mater. Chem. C* **9**, 13640-13646 (2021).

14. Qin Y., et al. Efficient near-infrared luminescence in LiInO2:Cr3+ phosphor for light-emitting-diodes. *Opt. Mater.* **143**, 114284 (2023).

15. Peng C.-Y., et al. Six- and five-coordinated Cr3+ in Ga2GeO5 invokes tunable broadband near-infrared emission toward night-vision applications. *Rare Metals* **42**, 3787-3796 (2023).

16. Chen G., et al. Unlocking Cr3+–Cr3+ coupling in spinel: Ultrabroadband near-infrared emission beyond 900 nm with high efficiency and thermal stability. *ACS Appl. Mater. Interfaces* **16**, 30185-30195 (2024).

17. Cai H., et al. Tuning luminescence from NIR-I to NIR-II in Cr3+-doped olivine phosphors for nondestructive analysis. *J. Mater. Chem. C* **9**, 5469-5477 (2021).

18. Liu G., et al. Structural rigidity control toward Cr3+-based broadband near-infrared luminescence with enhanced thermal stability. *Chem. Mater.* **34**, 1376-1384 (2022).

19. Zhong L., et al. Valence and site engineering enable efficient broadband near-infrared emission at 960 nm in Cr3+-activated forsterite. *Adv. Mater.* **37**, 2508768 (2025).

20. Liu G., et al. Li/Na substitution and Yb3+ co-doping enabling tunable near-infrared emission in LiIn2SbO6:Cr3+ phosphors for light-emitting diodes. *iScience* **24**, 102250 (2021).
